# Supplementary material for: Comprehensive single-cell atlas of the mouse retina
Source: PubMed Central journal article supplement (PMC11134544; doi:10.1016/j.isci.2024.109916), 2024-05-08
Supplement: mmc1.pdf [file mmc1.pdf]

**iScience, Volume 27**

**Supplemental information**

**Comprehensive single-cell**

**atlas of the mouse retina**

**Jin Li, Jongsu Choi, Xuesen Cheng, Justin Ma, Shahil Pema, Joshua R. Sanes, Graeme Mardon, Benjamin J. Frankfort, Nicholas M. Tran, Yumei Li, and Rui Chen**



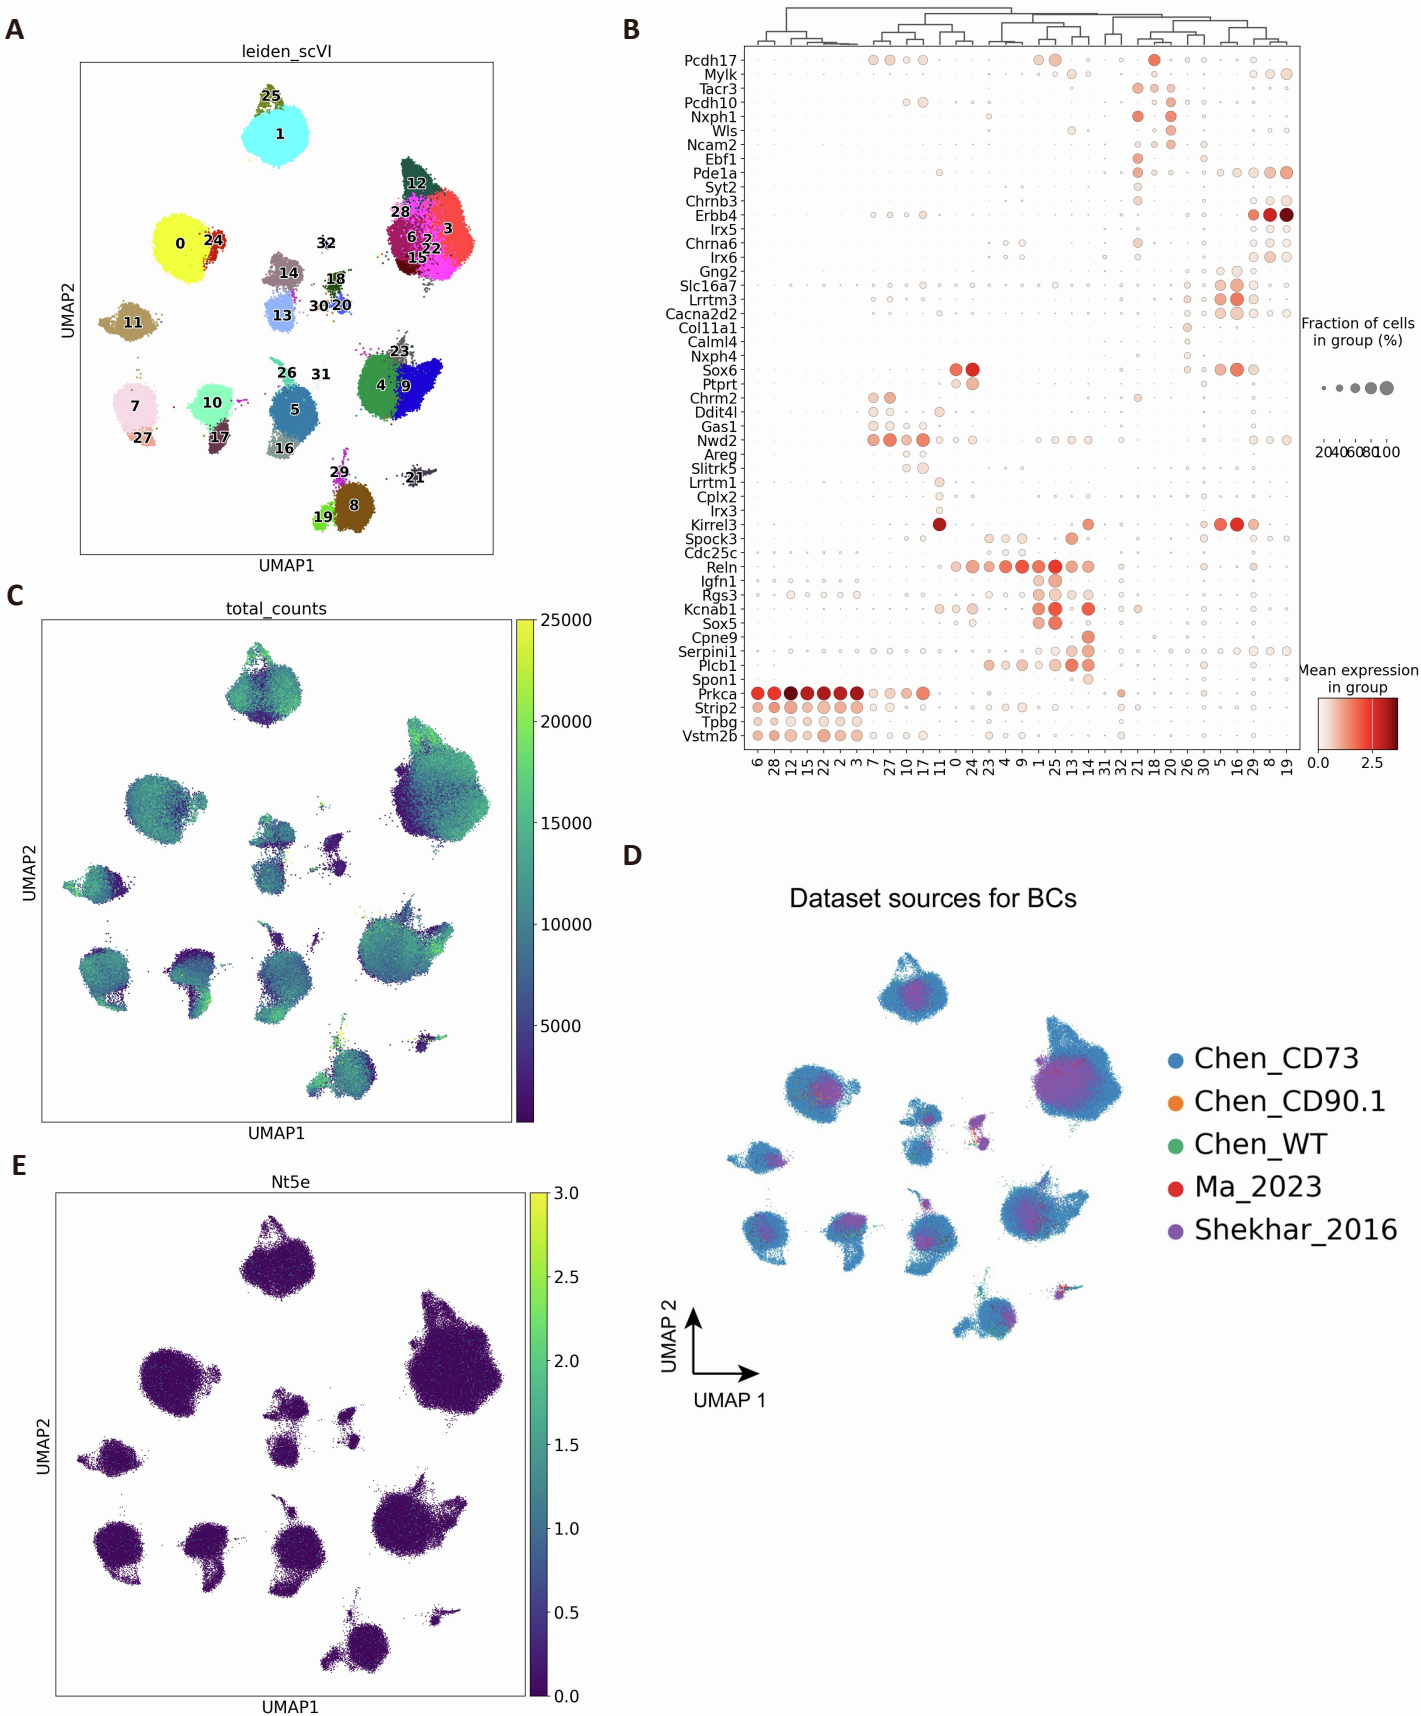

**Figure S2. Cell type annotation of bipolar cells. Related to Figure 2.**

**(A)** UMAP visualization of BCs colored by cell clusters. **(B)** Dot plot of BC type marker gene expression in each cluster. **(C)** UMAP plot of BCs colored by the total UMI counts. **(D)** UMAP plot of BCs colored by data sources. **(E)** UMAP plot of *Nt5e* (CD73) expression in BCs.

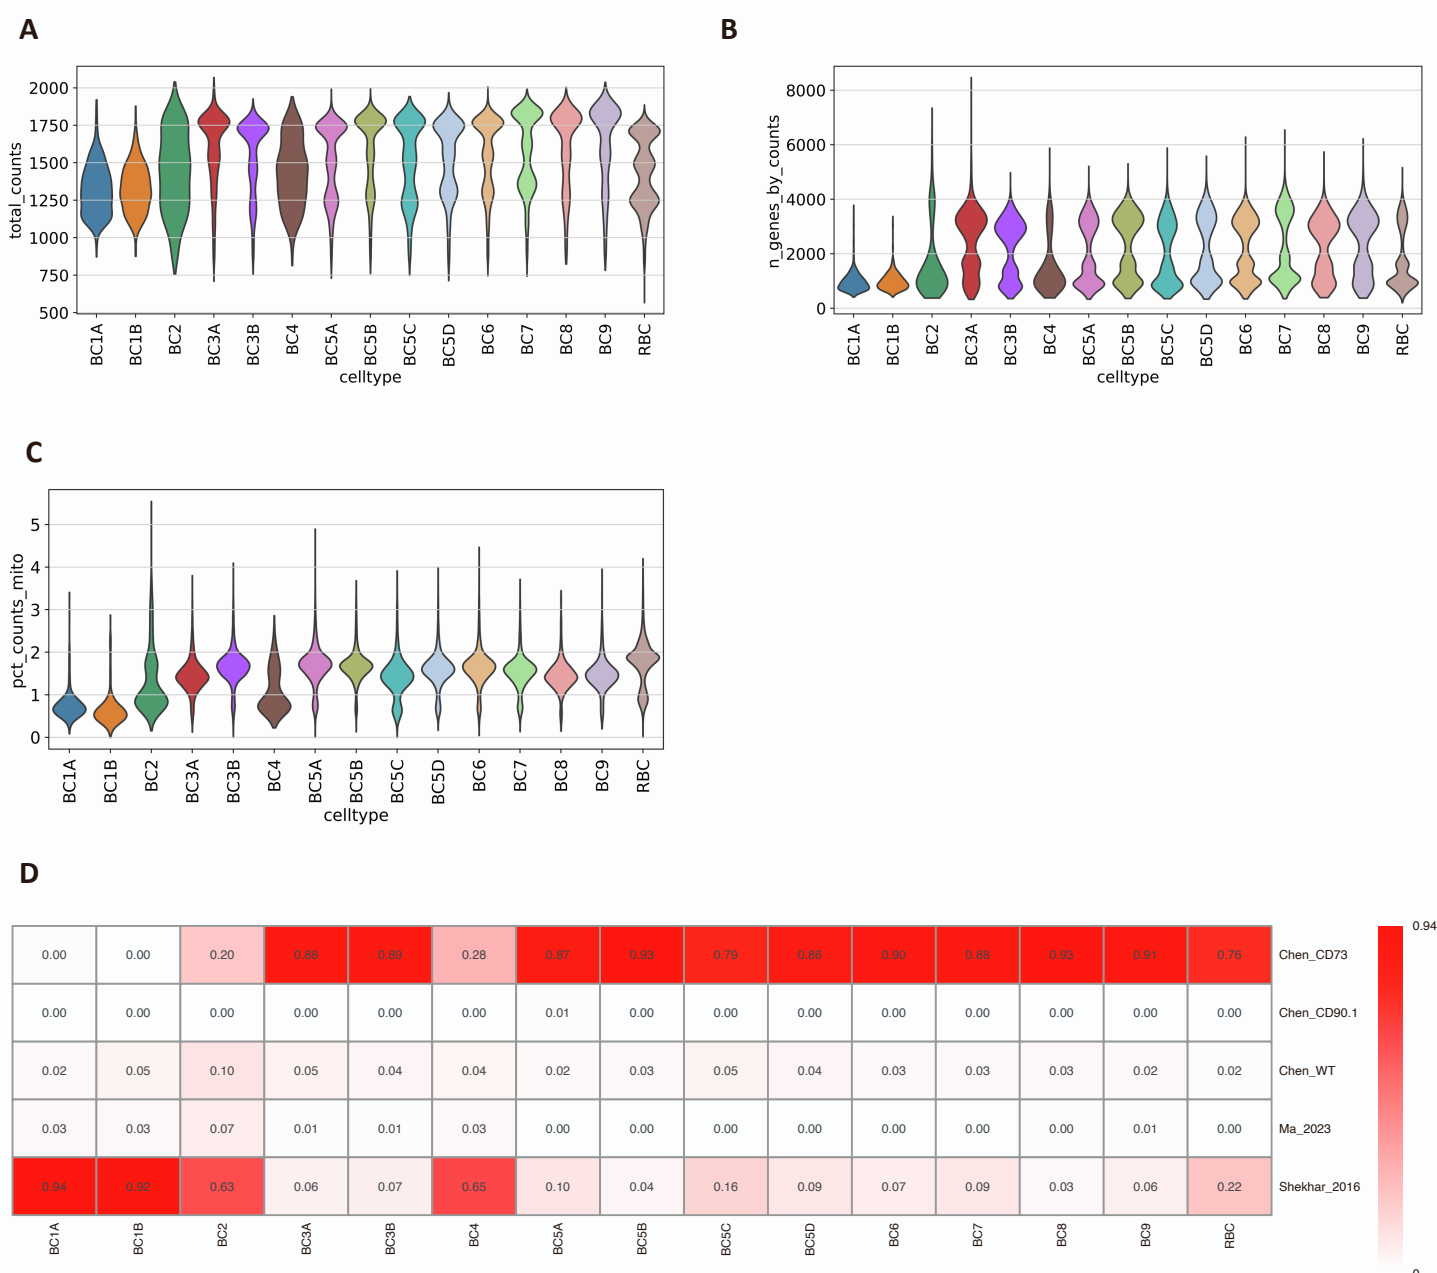

**Figure S3. Quality control of BC types. Related to Figure 2.**

Violin plots display the distribution of total UMI counts (**A**), the number of features (**B**), and the percentage of mitochondrial counts (**C**) for the annotated BC types. (**D**) The percentage of dataset sources for BC types. Each row represents a dataset source, while each column represents a BC type. The numbers in the table indicate the percentage of the dataset source for each cell type. The color key denotes the percentages.



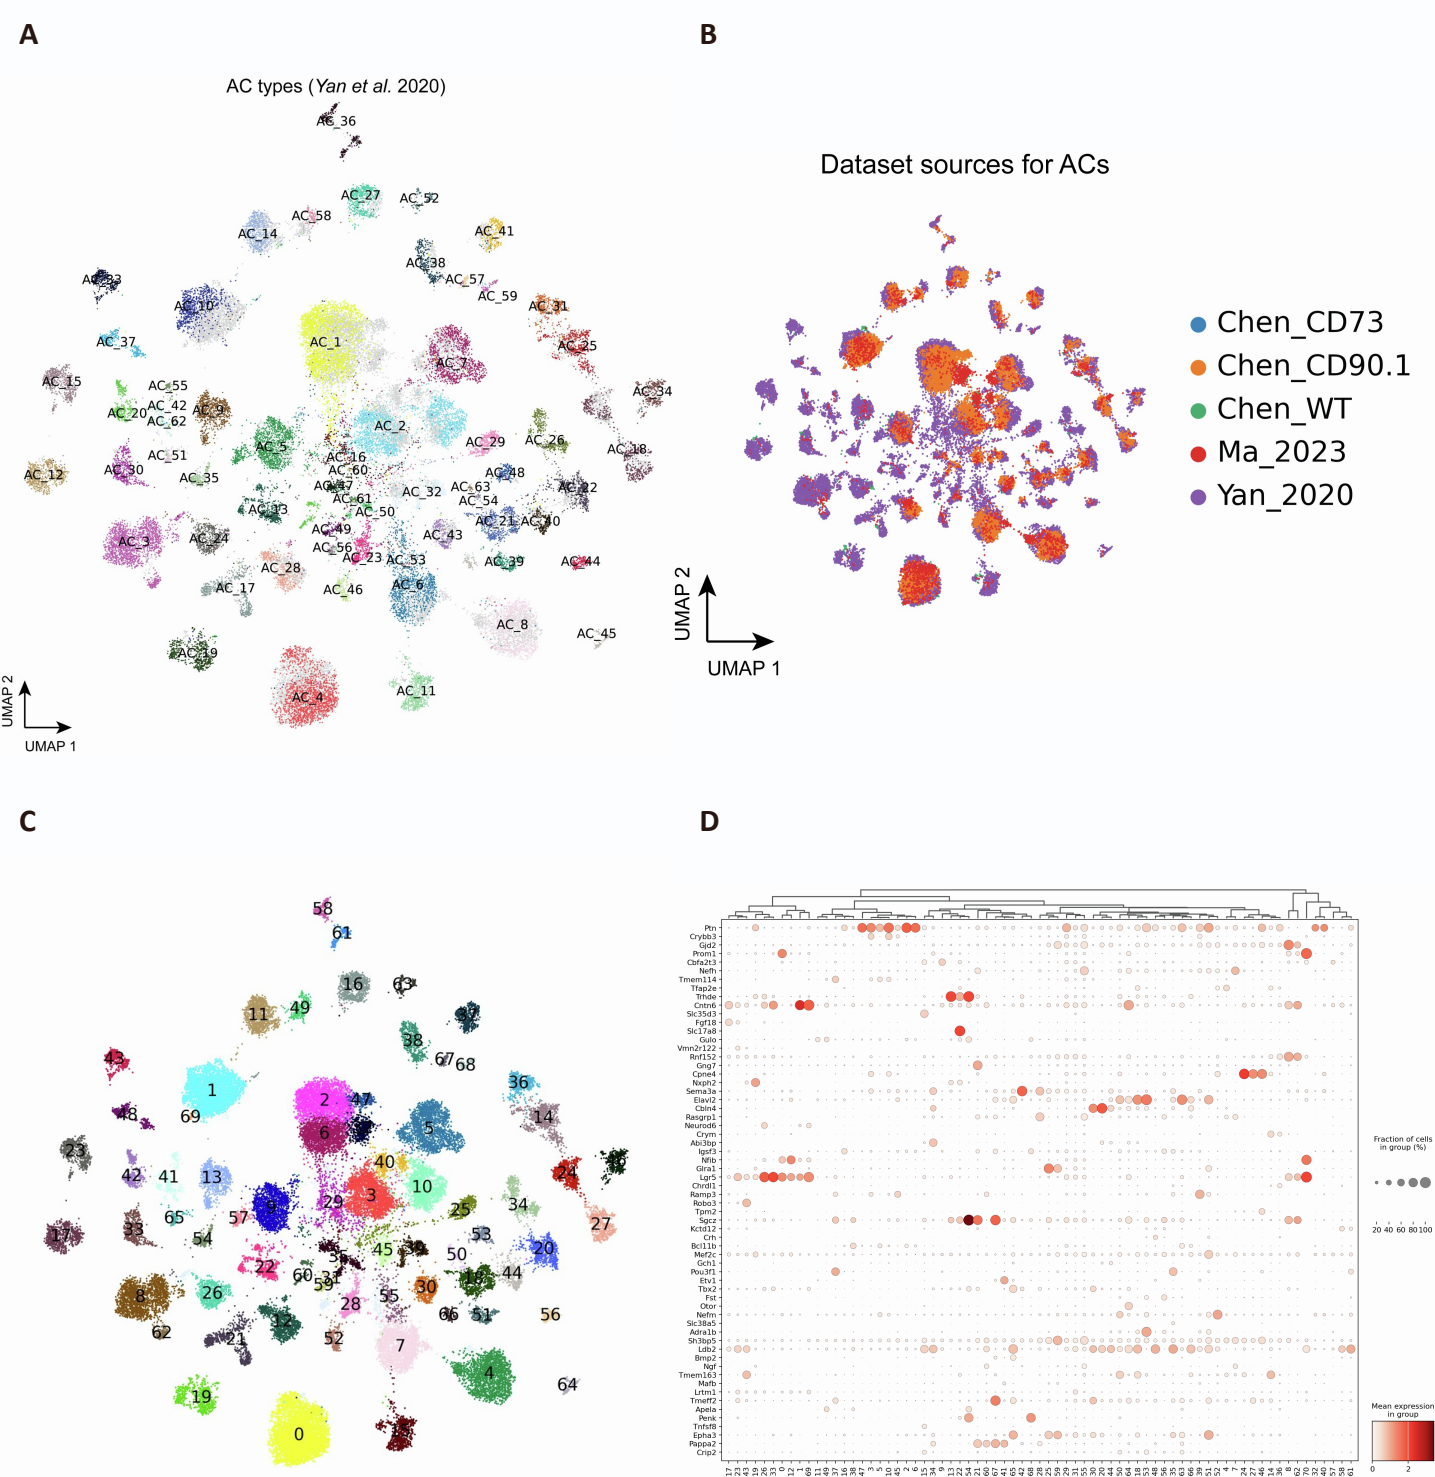

**Figure S4. Cell type annotation of amacrine cells. Related to Figure 3 and Figure 4.**

**(A)** UMAP visualization of ACs colored by public cell type labels from *Yan et al.* 2020. The newly discovered cells without public labeling are colored in gray. **(B)** UMAP plot of ACs colored by data sources. **(C)** UMAP visualization of ACs colored by 71 cell clusters. **(D)** Dot plot of AC type marker gene expression in 71 clusters.

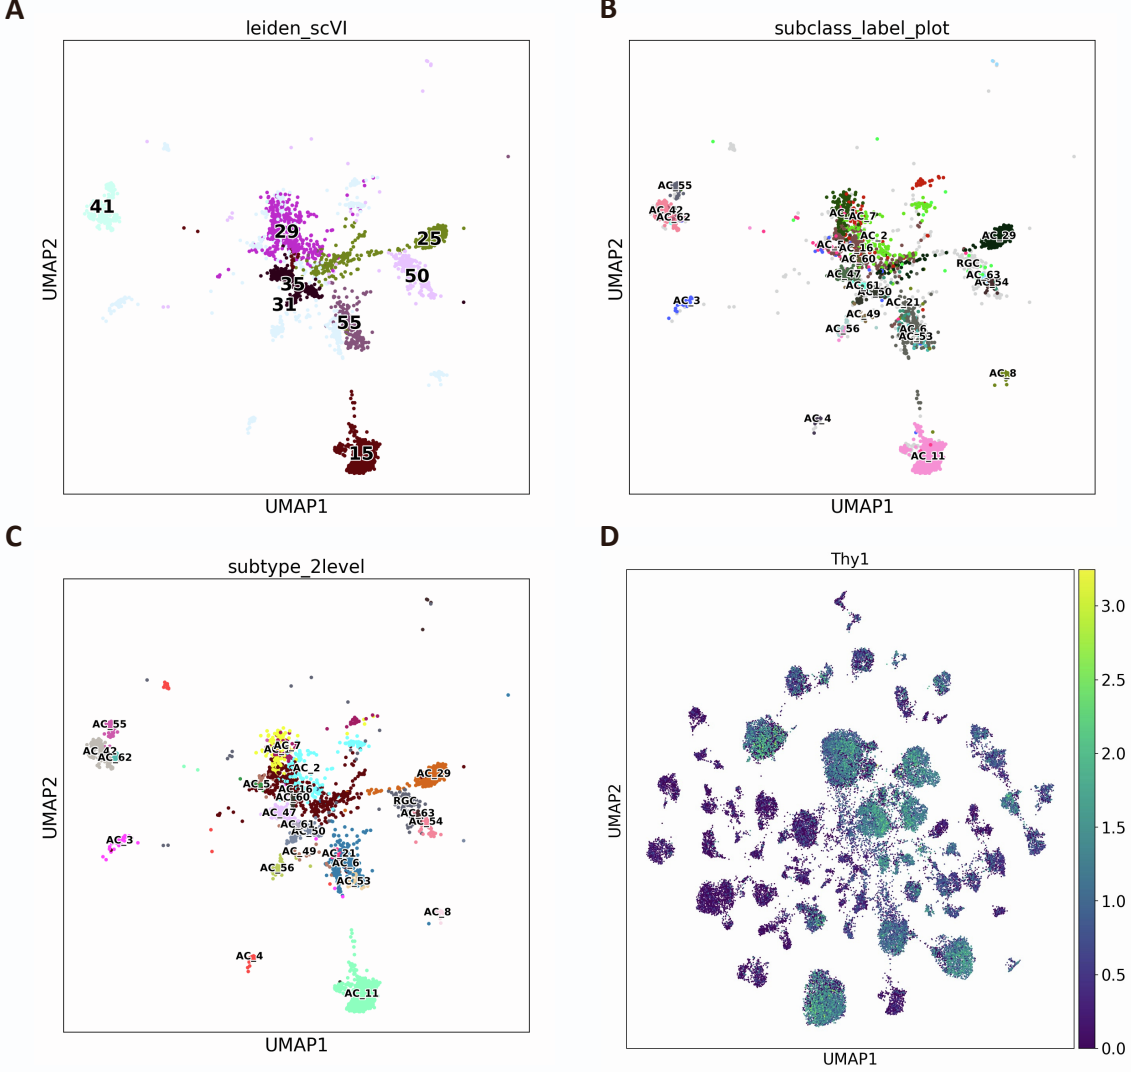

**Figure S5. Annotation of over-clustered amacrine cells. Related to Figure 3.**

(A) UMAP visualization of the 8 cell clusters in ACs that contain more than one type, based on Yan et al. 2020. The 8 clusters are C15, C25, C29, C31, C35, C41, C50, C55. (B) UMAP visualization of the 8 clusters colored by public cell type labels from Yan et al. 2020. (C) UMAP visualization of the 8 clusters colored by AC types using the two-level annotation approach in this study. (D) UMAP plot of Thy1 (CD90) expression in ACs.



A

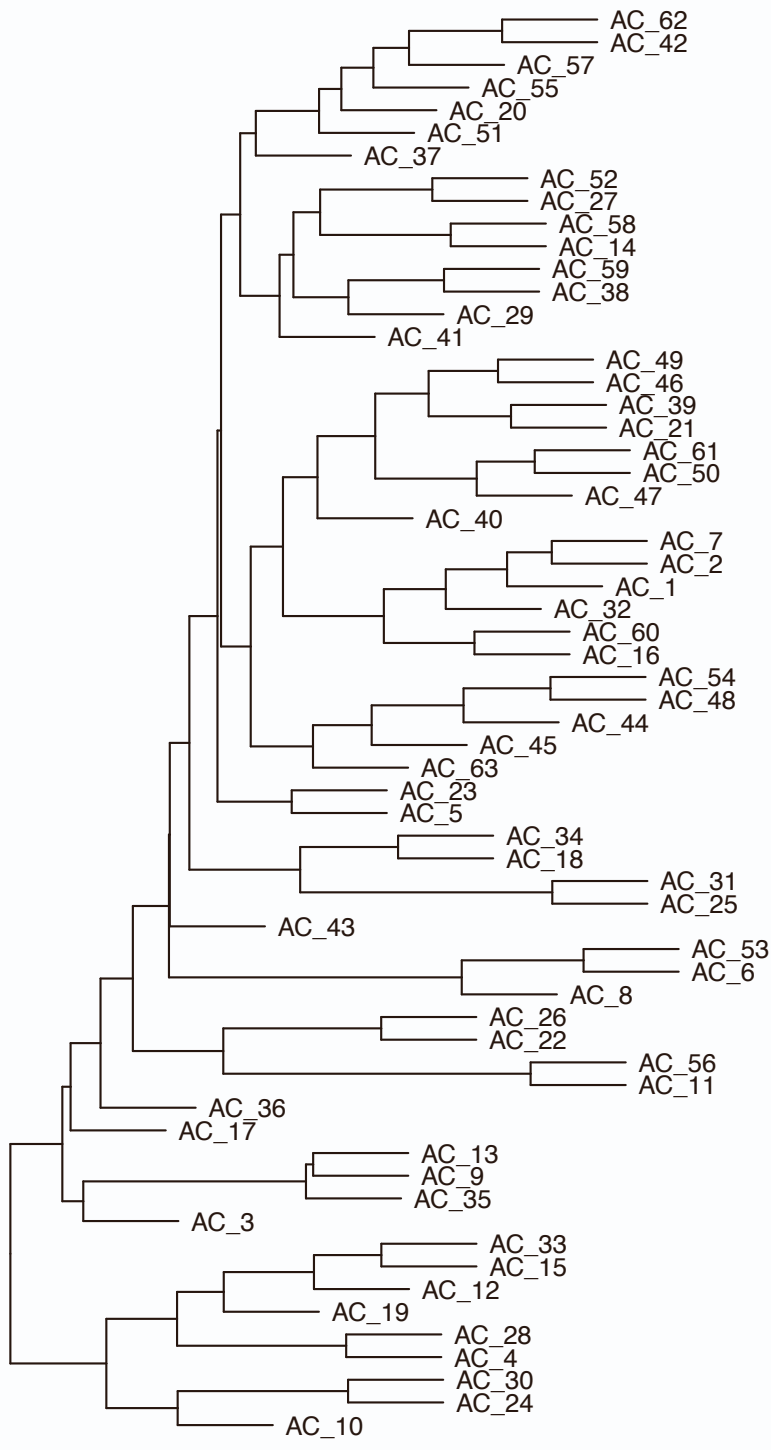

**Figure S7. Hierarchical clustering of AC types. Related to Figure 3 and Figure 4.**

(A) The hierarchical clustering is performed using the average normalized expression for AC types.

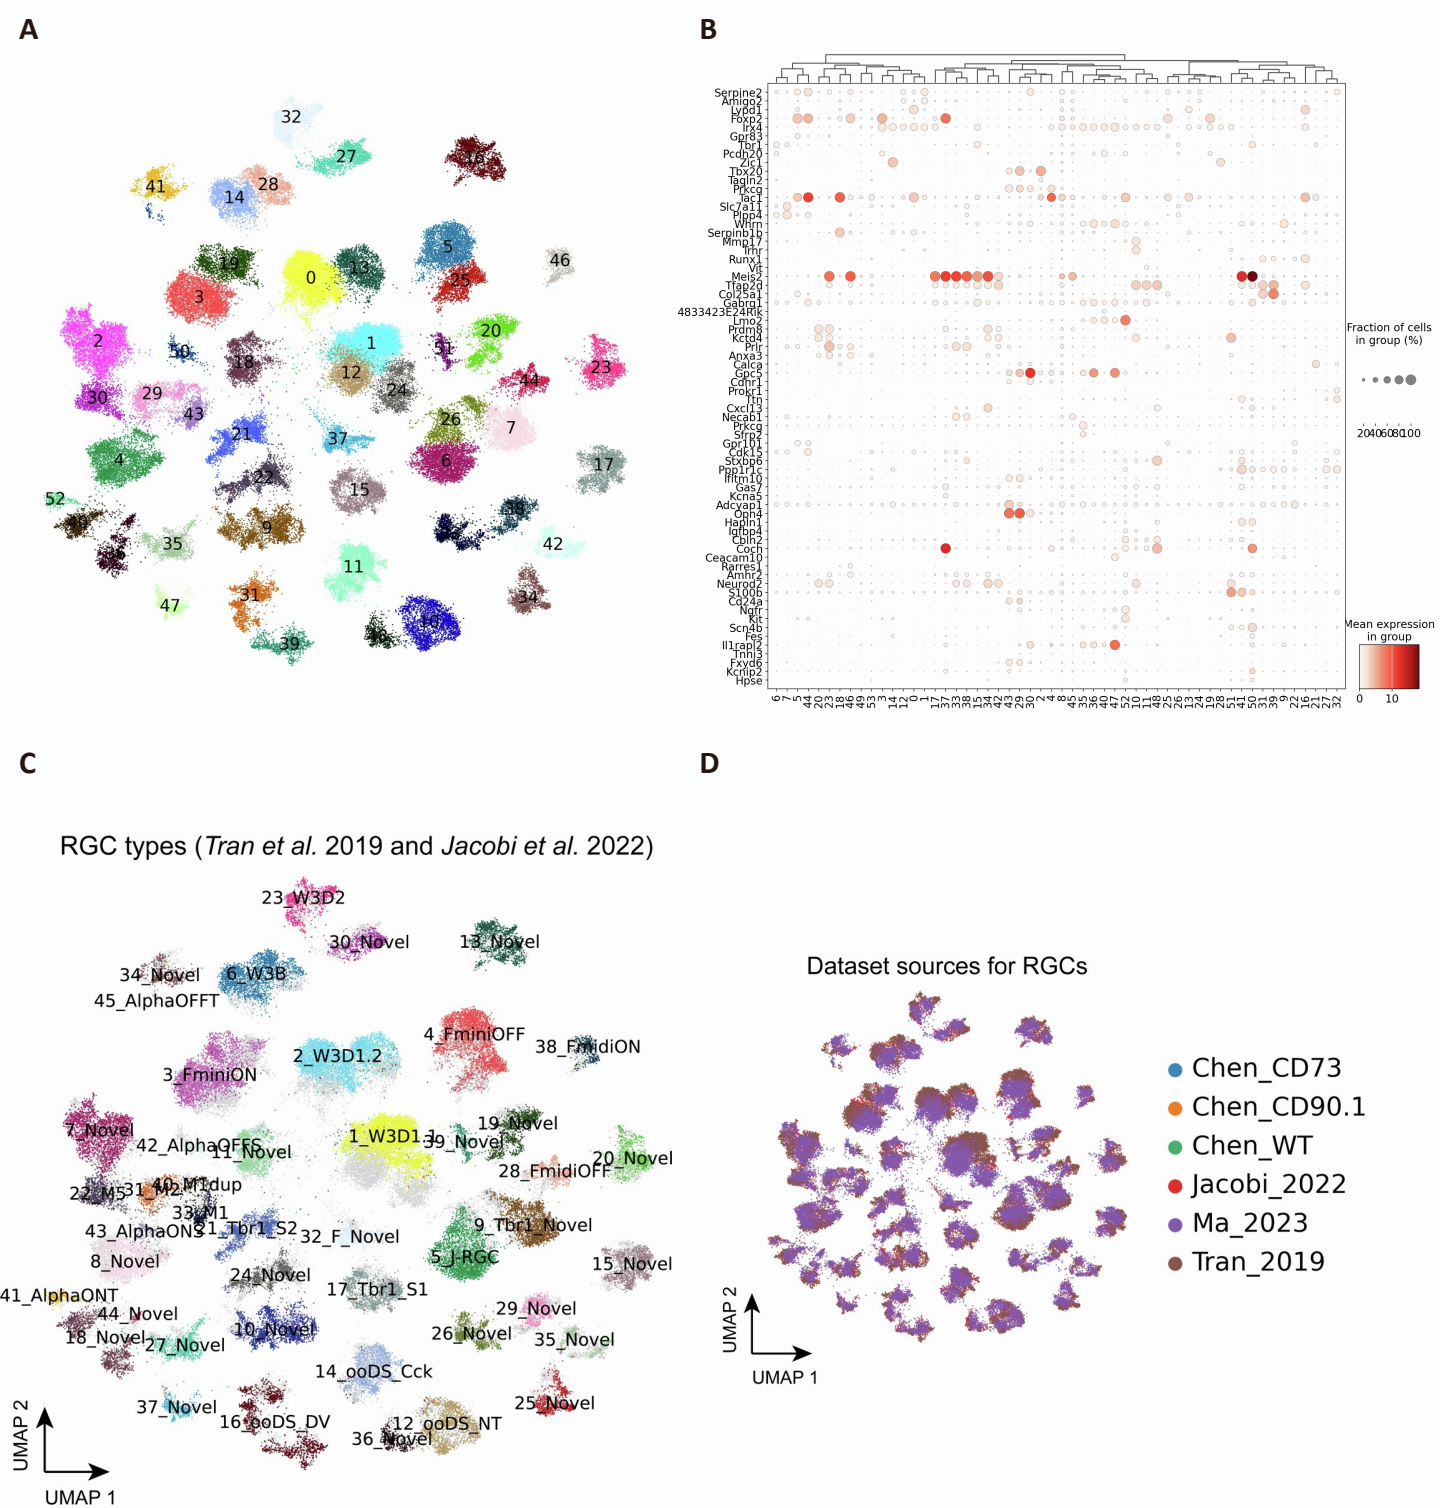

**Figure S8. Cell type annotation of retinal ganglion cells. Related to Figure 5.**  
**(A)** UMAP visualization of RGCs colored by cluster numbers. **(B)** Dot plot of RGC type marker gene expression in each cluster. **(C)** UMAP visualization of RGCs colored by public cell type labels from *Tran et al. 2019* and *Jacobi et al. 2022*. The newly discovered cells without public labeling are colored in gray. **(D)** UMAP plot of RGCs colored by data sources.



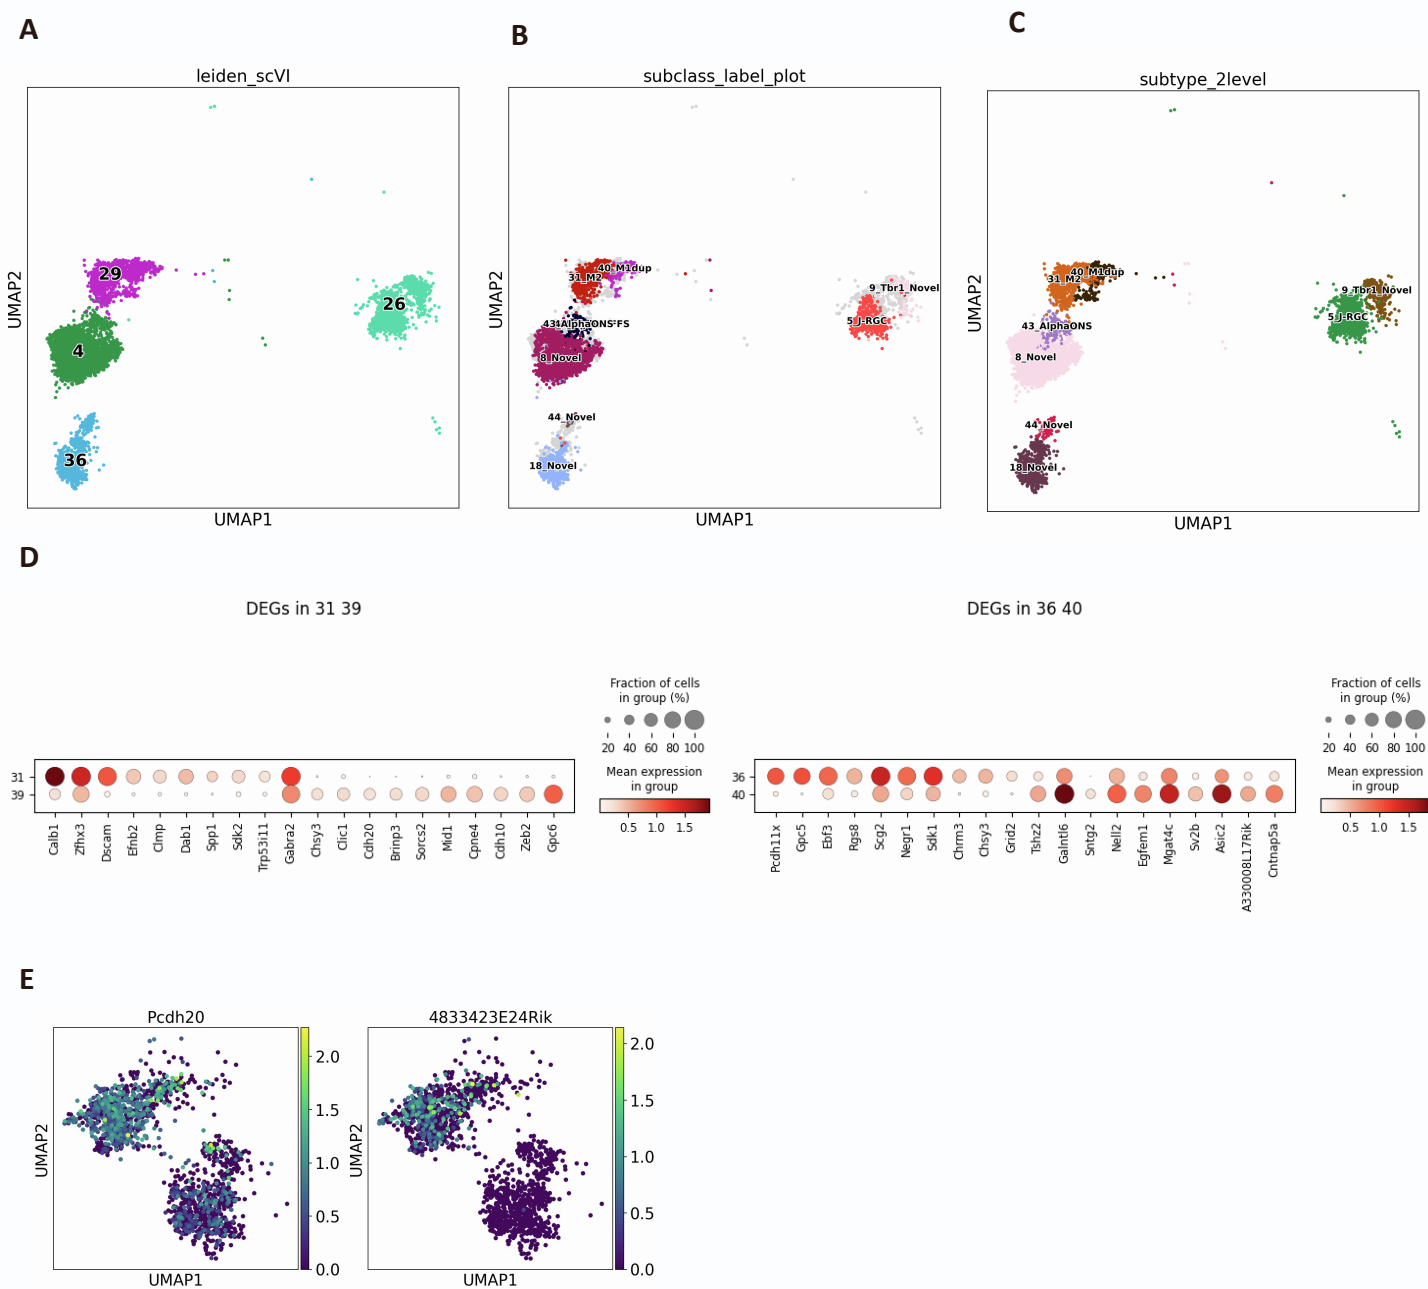

**Figure S9. Annotation of over- and under-clustered retinal ganglion cells. Related to Figure 5.**

**(A)** UMAP plot of the 4 clusters in RGCs that contain more than one type, based on *Tran et al.* 2019 and *Jacobi et al.* 2022. **(B)** UMAP plot of the 4 clusters colored by public cell type labels from *Tran et al.* 2019 and *Jacobi et al.* 2022. **(C)** UMAP visualization of the 4 clusters colored by RGC types using the two-level annotation approach in this study. **(D)** Dot plot showing the top 10 differentially expressed genes between split clusters for previously under-clustered RGC types. **(E)** Feature plot showing the marker gene expression of 18\_Novel type. Both markers are enriched in one cluster, but not the other.



**A**

Non-neuronal retinal cells

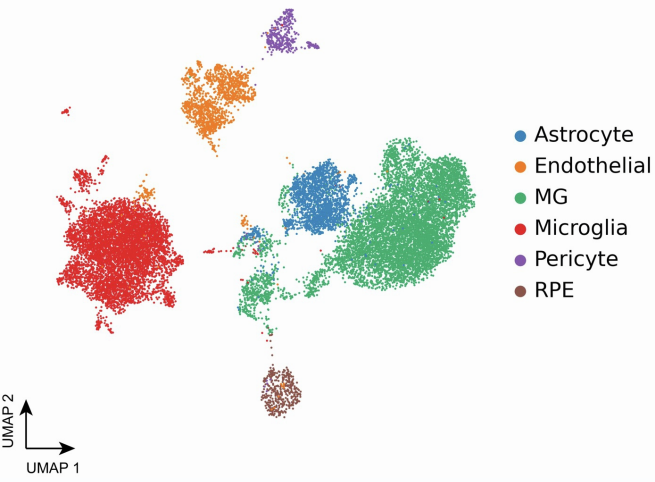**B**

Dataset sources for non-neuronal retinal cells

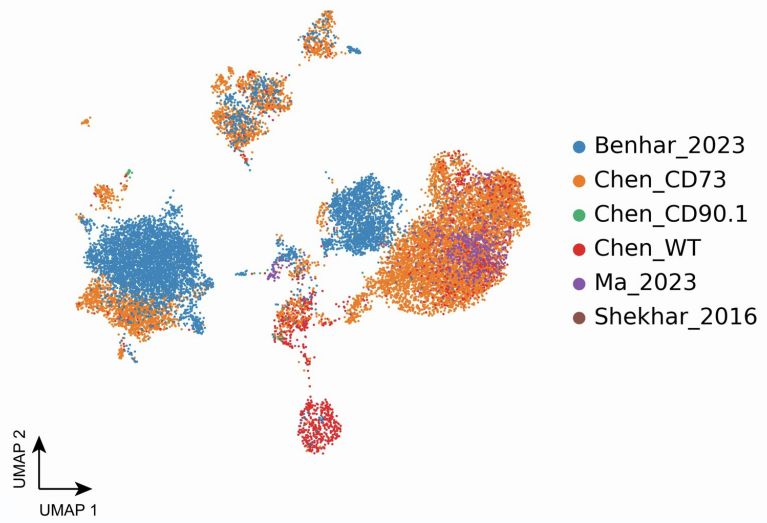**Figure S11. Non-neuronal retinal cells. Related to Figure 6.****(A)** UMAP visualization of non-neuronal retinal cells colored by major classes. **(B)** UMAP plot of non-neuronal retinal cells colored by dataset sources.
